# Supplementary material for: Deep Genotypic Species Delimitation of Aspergillus Section Flavi Isolated from Brazilian Foodstuffs and the Description of Aspergillus annui sp. nov. and Aspergillus saccharicola sp. nov.
Source: MDPI journal article supplement (doi:10.3390/jof8121279), 2022-12-06

**Table S3:** The high-resolution MS/MS spectrum of dereplicated metabolites of *Aspergillus annui* sp. nov. and *Aspergillus saccharicola* sp. nov

| Network clusters    | Compounds name                     | Molecular Formula                                             | m/z      | Mass (MFG <sup>+</sup> ) | Species                                    |
|---------------------|------------------------------------|---------------------------------------------------------------|----------|--------------------------|--------------------------------------------|
| Aflatoxins          | aflatoxin M1                       | C <sub>17</sub> O <sub>7</sub> H <sub>12</sub>                | 329.0657 | 328.0583                 | <i>A. saccharicola</i>                     |
|                     | aflatoxin G2                       | C <sub>17</sub> O <sub>7</sub> H <sub>14</sub>                | 331.0809 | 330.0739                 | <i>A. saccharicola</i>                     |
|                     | aflatoxin G1                       | C <sub>17</sub> O <sub>7</sub> H <sub>12</sub>                | 329.0655 | 328.0586                 | <i>A. saccharicola</i>                     |
|                     | aflatoxin B2                       | C <sub>17</sub> O <sub>6</sub> H <sub>14</sub>                | 315.0864 | 314.0790                 | <i>A. saccharicola</i>                     |
|                     | aflatoxin B1                       | C <sub>17</sub> O <sub>6</sub> H <sub>12</sub>                | 313.0708 | 312.0633                 | <i>A. saccharicola</i>                     |
|                     | sterigmatocystin                   | C <sub>18</sub> O <sub>6</sub> H <sub>12</sub>                | 325.0703 | 324.0633                 | <i>A. saccharicola</i>                     |
|                     | O-methylsterigmatocystin           | C <sub>19</sub> O <sub>6</sub> H <sub>14</sub>                | 339.0872 | 338.0790                 | <i>A. saccharicola</i>                     |
| Cyclopiazonic acids | Cyclopiazonic acid                 | C <sub>20</sub> N <sub>2</sub> O <sub>3</sub> H <sub>20</sub> | 337.1552 | 336.1480                 | <i>A. saccharicola</i>                     |
| Tenuazonic acids    | Tenuazonic acid                    | C <sub>10</sub> NO <sub>3</sub> H <sub>15</sub>               | 198.1128 | 197.1055                 | <i>A. saccharicola</i>                     |
|                     | Valine-tenuazonic acid             | C <sub>9</sub> H <sub>13</sub> NO <sub>3</sub>                | 184.0964 | 183.0891                 | <i>A. saccharicola</i>                     |
|                     | aspergillic acid                   | C <sub>12</sub> N <sub>2</sub> O <sub>2</sub> H <sub>20</sub> | 225.16   | 224.1527                 | <i>A. saccharicola</i>                     |
|                     | desertorin A                       | C <sub>22</sub> H <sub>18</sub> O <sub>8</sub>                | 411.1075 | 410.1002                 | <i>A. saccharicola</i>                     |
|                     | ergokonin B                        | C <sub>28</sub> H <sub>42</sub> O <sub>5</sub>                | 481.2924 | 458.3032                 | <i>A. saccharicola</i> and <i>A. annui</i> |
|                     | Nidulanin X3                       | C <sub>28</sub> H <sub>36</sub> N <sub>4</sub> O <sub>6</sub> | 525.2678 | 524.2634                 | <i>A. annui</i>                            |
|                     | Nidulanin X5                       | C <sub>28</sub> H <sub>36</sub> N <sub>4</sub> O <sub>3</sub> | 509.2744 | 508.2685                 | <i>A. annui</i>                            |
|                     | Nidulanin X6                       | C <sub>29</sub> H <sub>37</sub> N <sub>5</sub> O <sub>6</sub> | 552.2813 | 551.2743                 | <i>A. saccharicola</i>                     |
|                     | Kojic acid                         | C <sub>6</sub> O <sub>4</sub> H <sub>6</sub>                  | 143.0338 | 142.0265                 | <i>A. saccharicola</i> and <i>A. annui</i> |
|                     | Phytosphingosine                   | C <sub>18</sub> H <sub>39</sub> NO <sub>3</sub>               | 318.3001 | 317.2928                 | <i>A. saccharicola</i> and <i>A. annui</i> |
|                     | Chrysogine                         | C <sub>10</sub> N <sub>2</sub> O <sub>2</sub> H <sub>10</sub> | 191.0816 | 190.0743                 | <i>A. saccharicola</i>                     |
|                     | Flavin                             | C <sub>12</sub> H <sub>10</sub> N <sub>4</sub> O <sub>2</sub> | 243.0874 | 242.0804                 | <i>A. annui</i>                            |
|                     | Parasiticolide A (find by formula) | C <sub>26</sub> O <sub>8</sub> H <sub>30</sub>                | 493.1838 | 470.1946                 | <i>A. saccharicola</i>                     |
|                     | Anthranilic acid                   | C <sub>7</sub> H <sub>7</sub> NO <sub>2</sub>                 | 138.0550 | 137.0476                 | <i>A. saccharicola</i>                     |
|                     | erythroglauicin                    | C <sub>16</sub> H <sub>12</sub> O <sub>6</sub>                | 301.0677 | 300.0634                 | <i>A. saccharicola</i>                     |
|                     | Pantothenic acid                   | C <sub>9</sub> H <sub>17</sub> NO <sub>5</sub>                | 220.1179 | 219.1106                 | <i>A. annui</i>                            |

**Top: the high-resolution MS/MS spectra of dereplicated metabolites; middle: the comparison between MS/MS spectra of certain metabolite and standard; bottom: the MS/MS spectra of standard compound in the in-house library.**

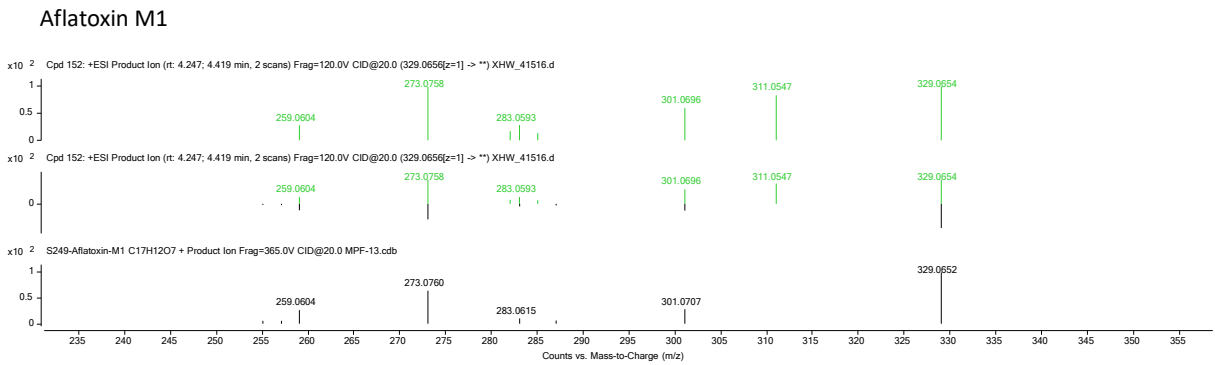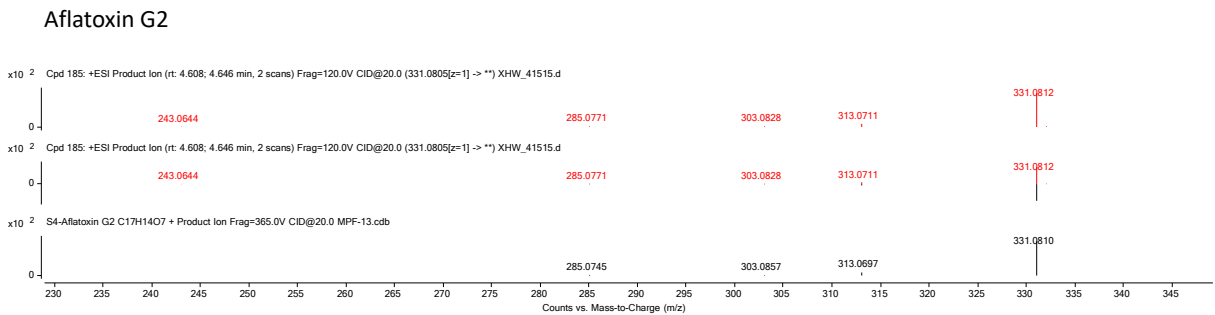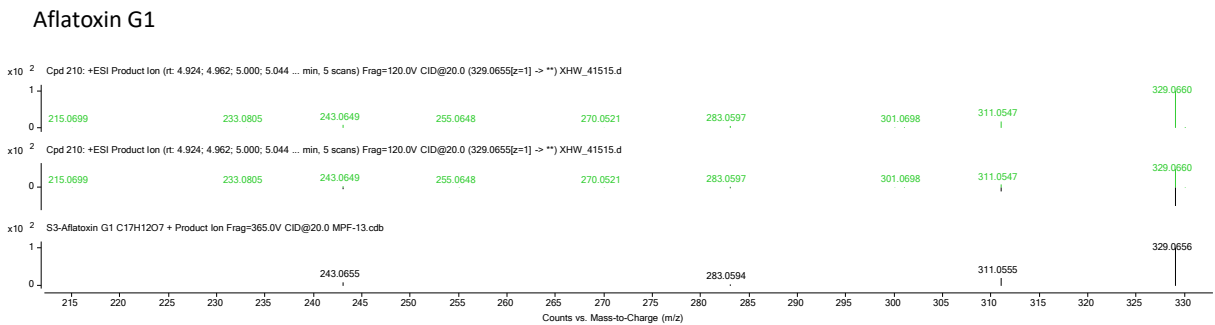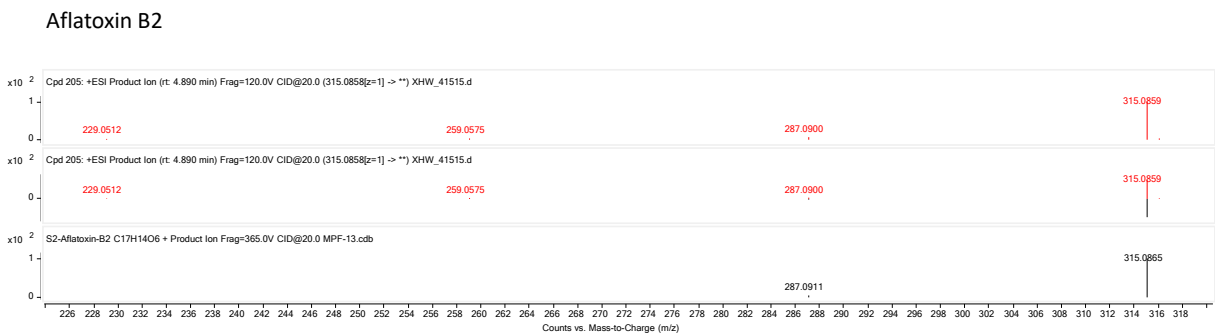

Aflatoxin B1

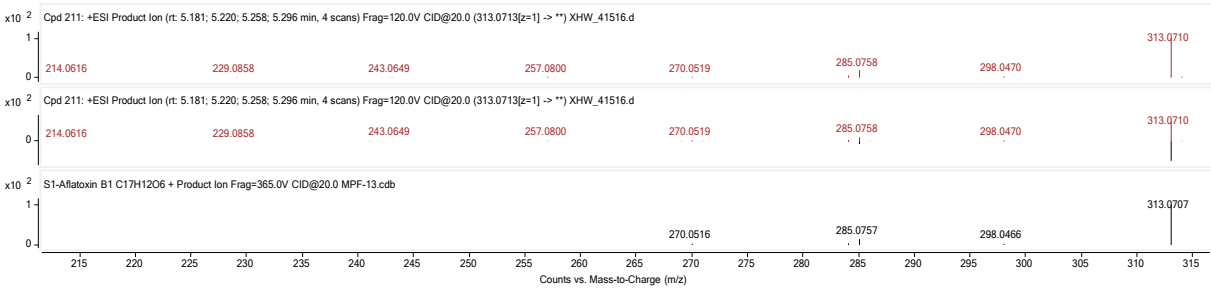

Sterigmatocystin

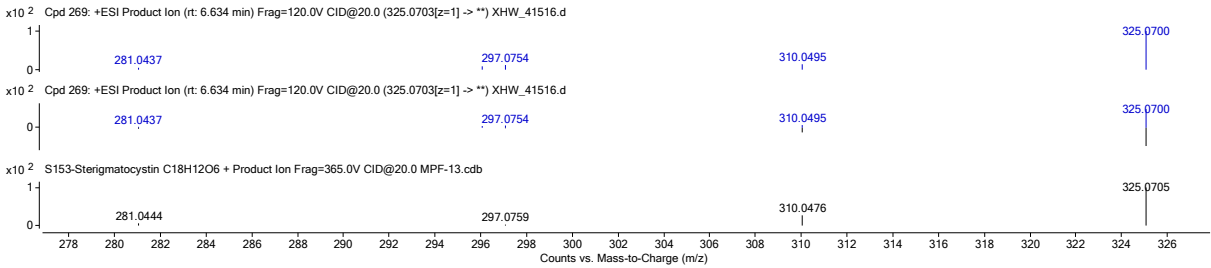

Cyclopiazonic acid

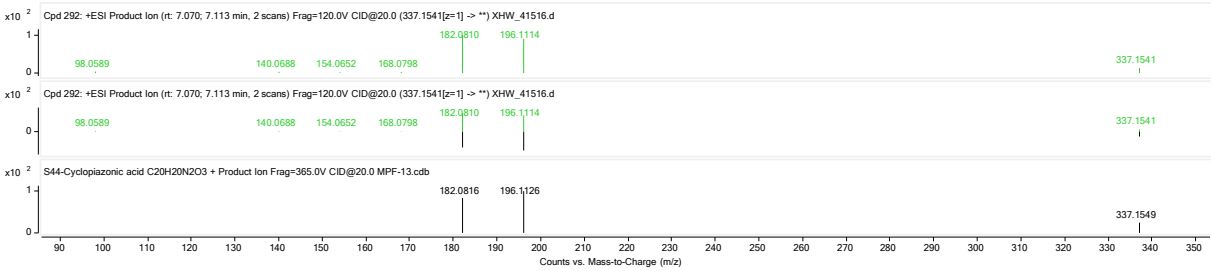

Valine-tenuazonic acid

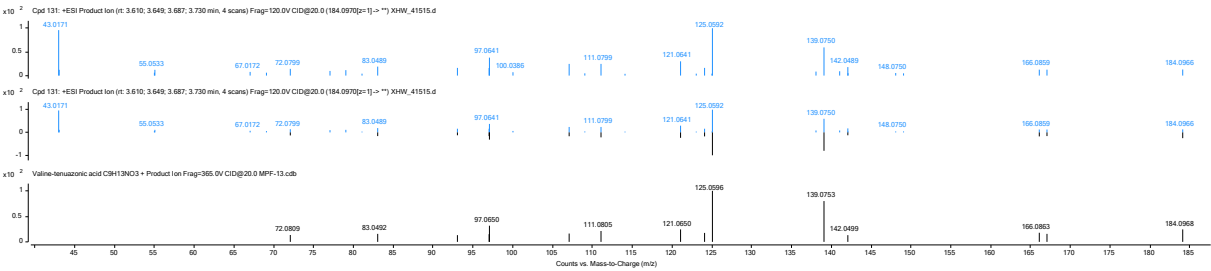

Tenuazonic acid

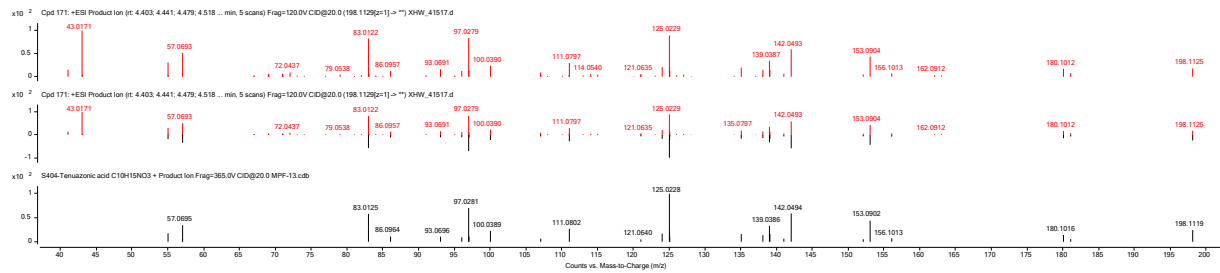

Desertorin A

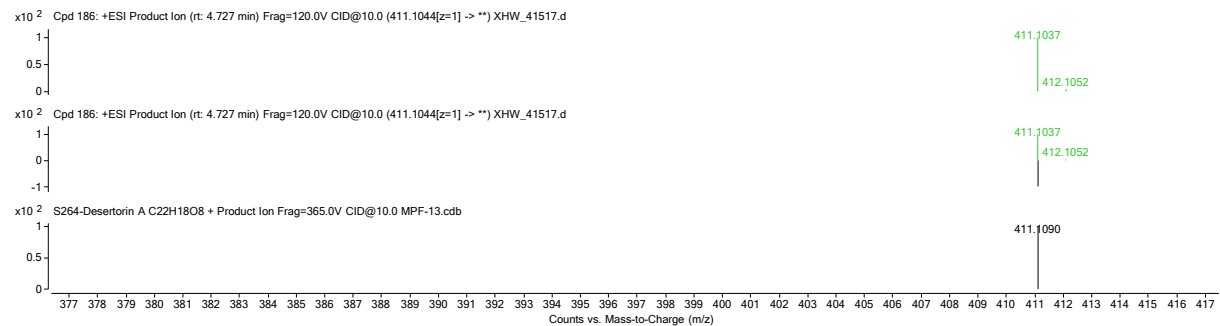

Kojic acid

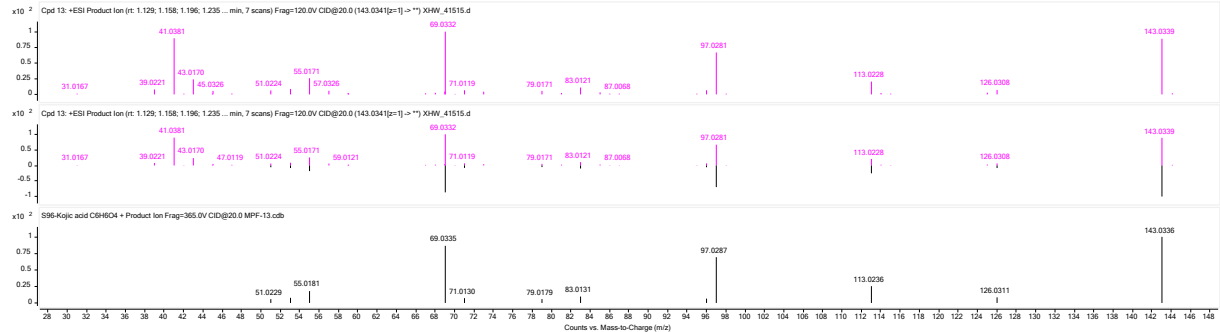

Nidulanin X3

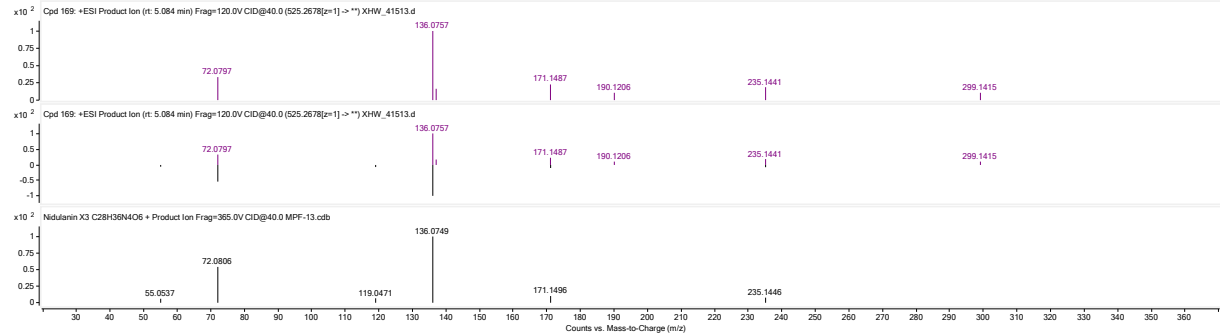

Nidulanin X5

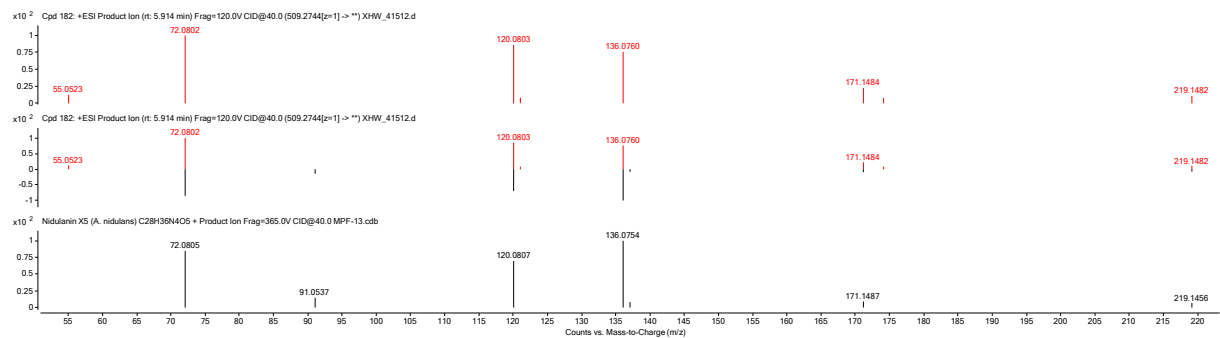

Nidulanin X6

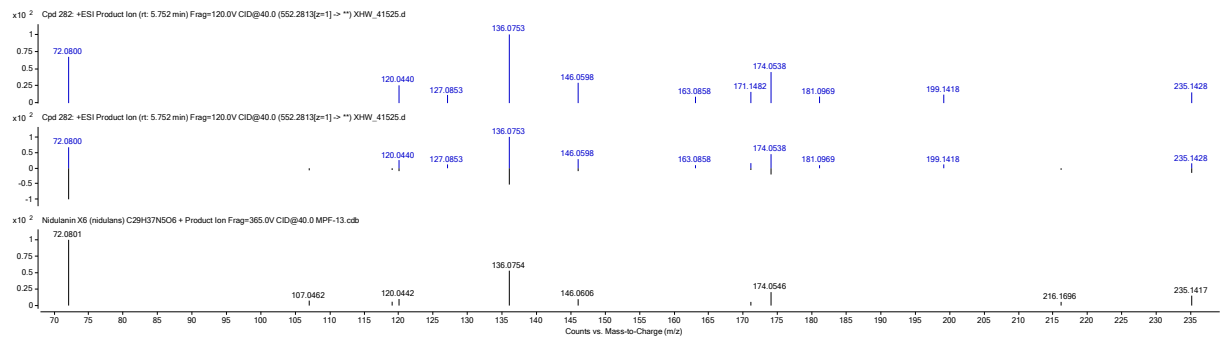

Anthranilic acid

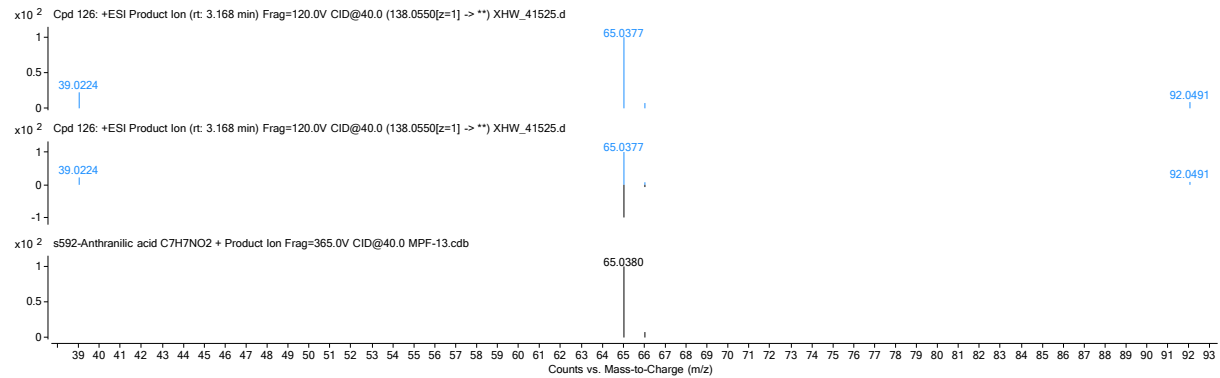

Pantothenic acid

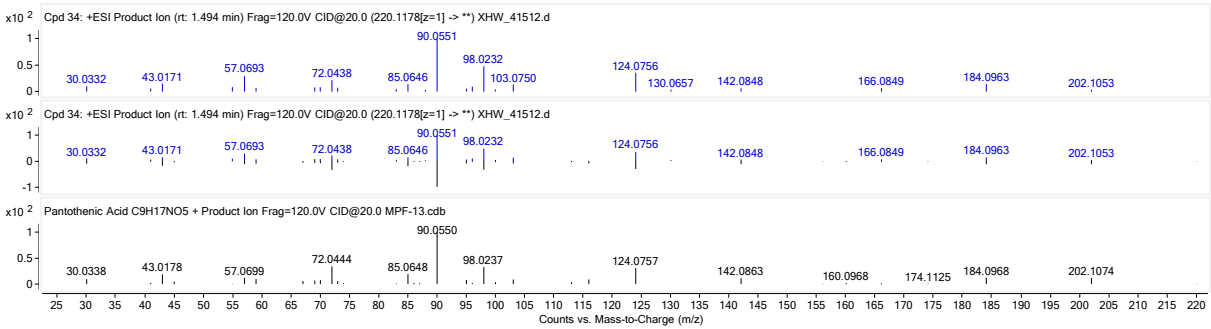

Erythroglaucon

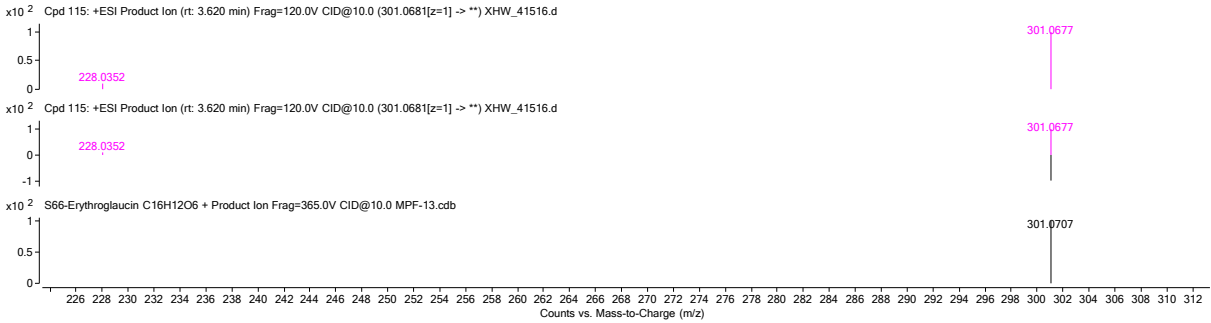

Aspergillic acid

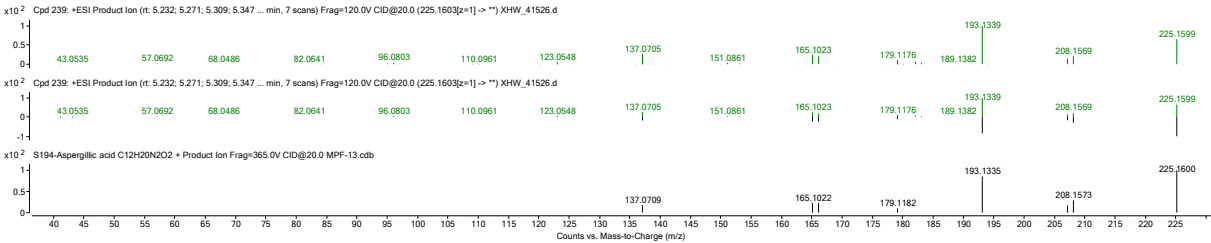

Chrysogine

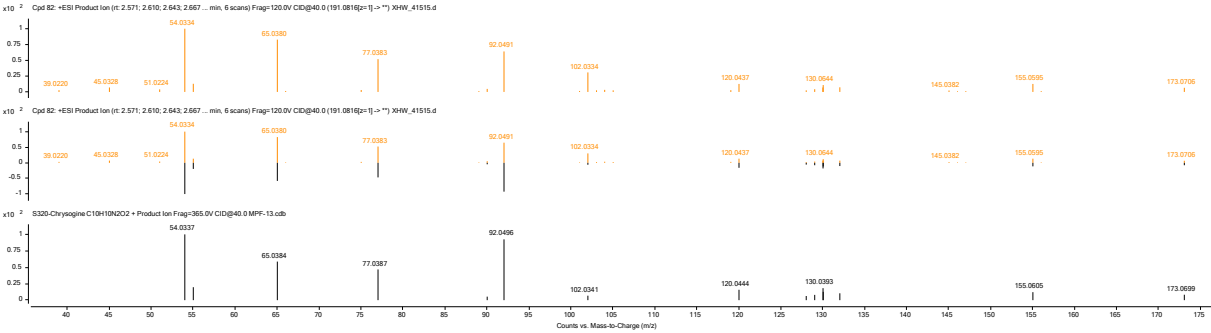

## Flavin

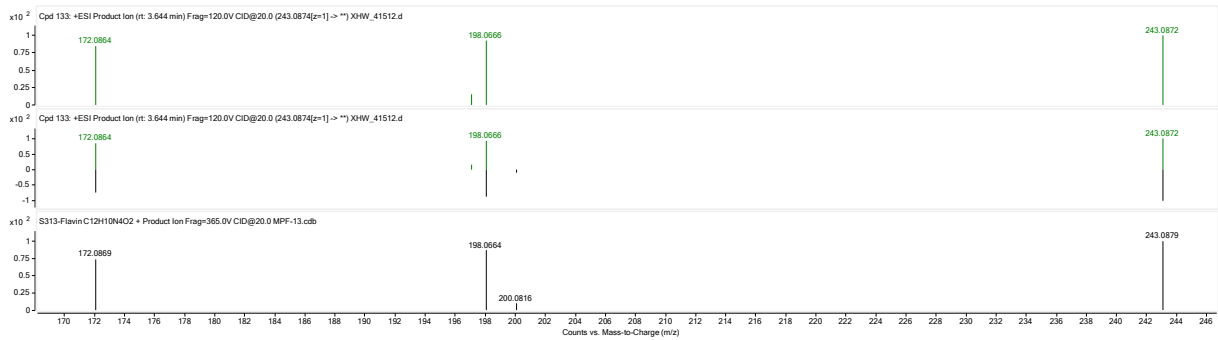

## Ergokonin B

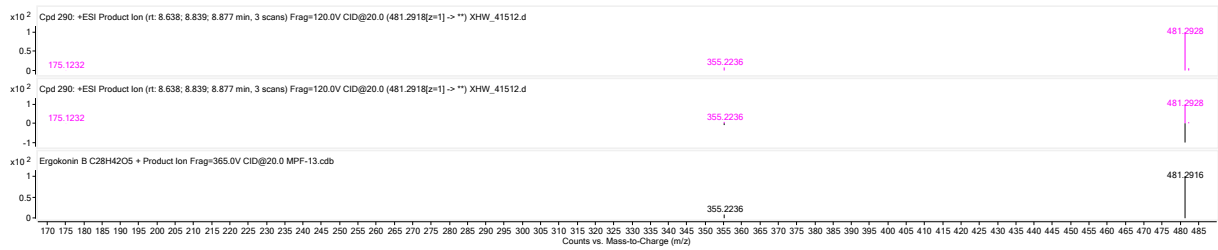

The HRESIMS (top) and the MS/MS (20 ev) spectra of parasiticolide A

## Parasiticolide A (find by formula)

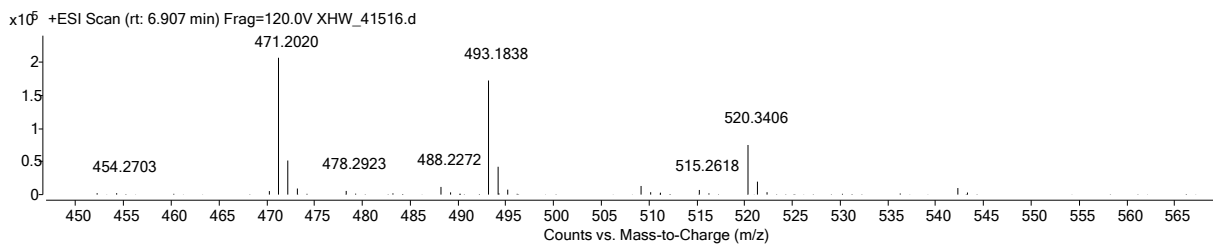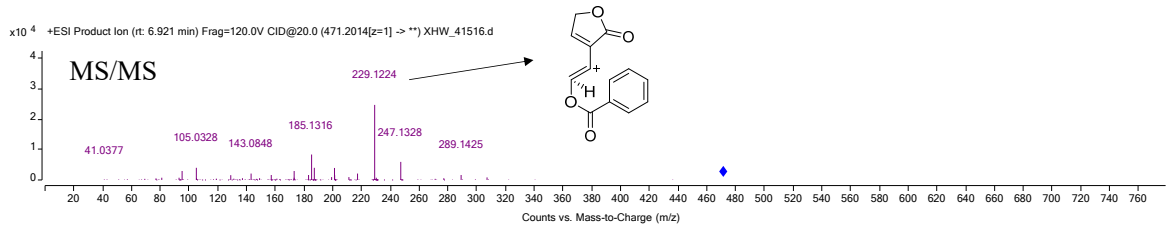

Supplement: s1 [file s1]
