# Supplementary material for: Deep Genotypic Species Delimitation of Aspergillus Section Flavi Isolated from Brazilian Foodstuffs and the Description of Aspergillus annui sp. nov. and Aspergillus saccharicola sp. nov.
Source: MDPI journal article supplement (doi:10.3390/jof8121279), 2022-12-06
Supplement: s1 [file s1]

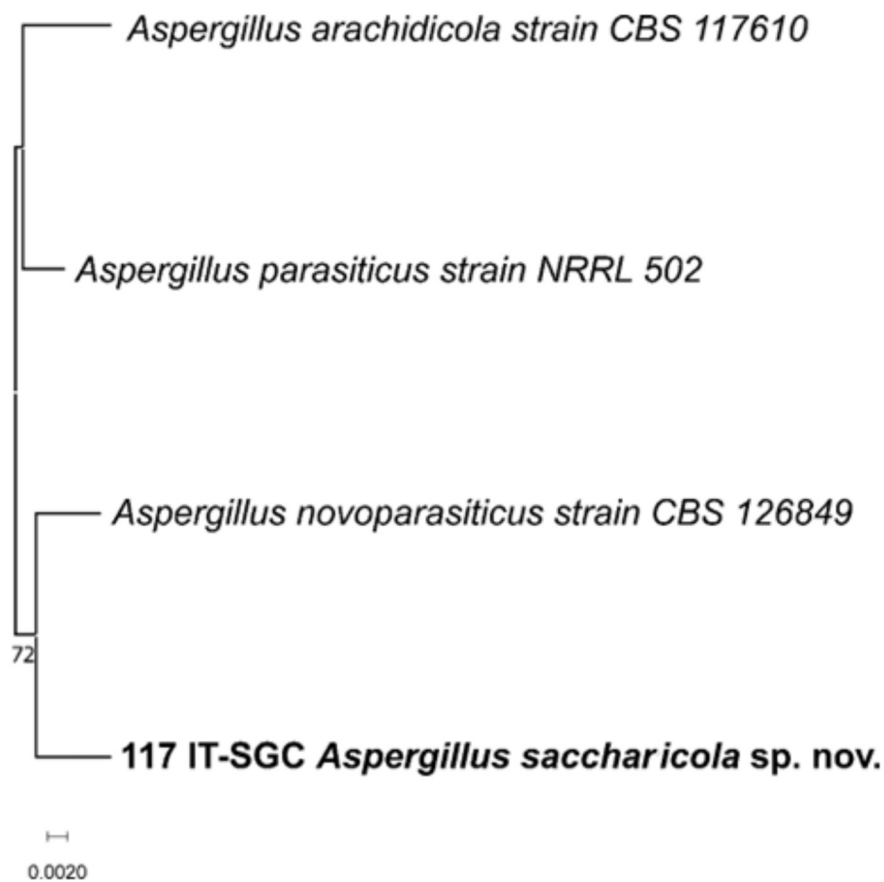

**Figure S1.** Maximum Likelihood tree of *Aspergillus parasiticus* clade based on combined dataset sequences (*ITS+niaD*).

>117 IT-SGC niaD

ACGGGTGTTTCATCCGTTTAACGTTGAGCCACCTCTTACAGATCTGTATAAAGAAGGTACGAGTTATAGC  
TGCTCCACCTCCTATCCTCATCAGATTGCTCCCTTGAGCCGTTACATTCTCACACTCTGAAAGGGTTTTTA  
ACATCGCCGGAGCTCTTCTATGTTTCGAAATCATGGCCAGTCCCTCATGTCAAGGATGAAGATATCCCTC  
ACTGGGAAATTACTATTGAAGGGTAGTAAAGTACTAGGTTCTCTGCCAAACATCCGCTAACCAAAGTA  
TAGACTGGTAGAGAAGCCTTTGGTACTAACTTCCGACAAGTGTGTCAGCAGTACGACCAAATCACGG  
CGCCCATCACCTTGTGTGTGCAGGCAATCGACGCAAAGAGCAAACATTGTCCGTAAAACGAAAGGC  
TTTTCTGGGGATCGGCGGGACTATCGACTGCCCTCTTCACTGGCCCATTGCTGGCGGATATCCTCCGC  
AGTGCGAAACCCCTGCGTCAAGCGAAATACGTCTGTATGGAAGGAGCGGATAAGCTGGTATGCTGTAC  
CTCTATCTTATGATGATAATTACTAAGTTCGCTGCAGCCCAATGGTCACTACGGCACATCTATTAAATTG  
AACTGGGCCCT

>117 IT-SGC ITS

GGTTCCTAGCGAGCCCAACCTCCACCCGTGTTTACTGTACCTTAGTTGCTTCGGCGGGCCCGCCGTCAT  
GGCCGCGGGGGCGTCAGCCCCGGGCCCGCGCCCGCGGAGACACCACGAACTCTGTCTGATCTAGTG

AAGTCTGAGTTGATTGTATCGCAATCAGTTAAAACTTTCAACAATGGATCTCTTGGTTCCGGCATCGATG  
AAGAACGCAGCGAAATGCGATAACTAGTGTGAATTGCAGAATTCCGTGAATCATCGAGTCTTTGAACG  
CACATTGCGCCCCCTGGTATTCCGGGGGGCATGCCTGTCCGAGCGTCATTGCTGCCATCAAGCACGGC  
TTGTGTGTTGGGTCGTCGTCCCCTCTCCGGGGGGGACGGGCCCCAAAGGCAGCGGCGGCACCGCGTCC  
GATCCTCGAGCGTATGGGGCTTTGTCACCCGCTCTGTAGGCCCGGCCGGCGCTTGCCGAACGAAAAC  
AACCATTCTTTCAGGTTGACCTCGGATCAGGTAGGGATACCCGC
